# Supplementary material for: Obstacles and opportunities for injury prevention in professional football in Qatar: exploring the implementation reality
Source: PubMed Central journal article supplement — BMJ Open Sport Exerc Med. 2023 Mar 10;9(1):e001370. doi: 10.1136/bmjsem-2022-001370 (PMC10008252; doi:10.1136/bmjsem-2022-001370), 2023-03-10
Supplement: bmjsem-2022-001370supp001.pdf [file bmjsem-2022-001370supp001.pdf]

## **INTERVIEW QUESTIONS**

### **QUALITATIVE INTERVIEW REGARDING INJURY PREVENTION IN QSL CLUBS**

#### **General information:**

Full Name:

Age:

Position in the club:

Pathway with Qatari clubs:

#### **Qualitative interview introduction**

##### **Introducing the interviewee and the interviewer**

**Context:** Understand the barriers and facilitators to the implementation of injury prevention in elite football by tapping into the collective experiences and wisdom of those directly involved.

**Process:** Length (30-45 min), semi-structured interview, open ended, audio recorded explanation, explaining the confidentiality (anonymized, what will happen to the audio) and what we are going to do with the data.

**Questions:** anything that they would like to ask.

#### **1. Injury prevention perception**

**What do you think about injury prevention in football in Qatar?**

*Prompts:*

Can you explain more?

#### **2. Injury factors**

**Thinking about factors inside the player, can you tell me about ones you think might make injuries more likely to happen?**

*Prompts:*

*Can you give me an example? Or Can you explain me how/why?*

**Thinking about factors outside the player, can you tell me about ones you think might make injuries more likely to happen?**

*Prompts: Can you give me an example? Or Can you explain me how/why?*

**Based on your experience and apart from the things that you have already told me, are there any other things that make injuries more likely to happen?**

*Prompts: Can you explain me more how/why?*

#### **3. Experience of injury prevention implementation at the QSL clubs**

*We will emphasize to the interviewees that all the questions here are about their entire experience with QSL club(s), and not their experience outside Qatar and/or with non-football sports.*

**What actions (if any) do you usually take to prevent injuries?**

*Prompts: can you explain more? Any example? Experience?*

**How did you come up with the idea to use these strategies?**

*Prompts: was this based on a specific example/experience?*

**Thinking about your own experience in the field, what do you think are the most important measures and components of preventing injury?**

*Prompts: for example? Can you tell me more about this?*

**What has been your own experience with implementing injury prevention strategies in your club(s)?**

*Prompts: Can you tell me more?*

**Thinking about your own experience in the field, what conditions would need to be in place to make you more effective in injury prevention?**

*Prompts: can you explain more?*

#### **4. Main injury prevention perspective**

**Can you share any specific experiences you have had when you were trying to do injury prevention?**

*Prompts: Could you explain more about the reasons why do you think your attempts were successful? Have you faced any challenges?*

*Could you explain more about the reasons why do you think your attempts were unsuccessful?*

**If there is one lesson you would share with your colleagues, what would that be?**

#### **5. Overview of the club**

**Can you specify all the persons involved in the injury prevention program?**

*Prompts: Their qualifications? Position? Role?*

**Who has the main responsibility of preventing injury at your club?**

*Prompts:*

*Do you feel this person should be responsible? Why?*

*Could you tell me more about his role?*

*Do you have any suggestions about this?*

#### **6. Conclusion**

**Are there any relevant points we haven't covered that you would like to mention?**

**Are there any questions you would like to ask me?**

*Thank you*
